# Supplementary material for: Metrics for evaluating the quality in linear atmospheric inverse problems: a case study of a trace gas inversion
Source: Copernicus journal article supplement (doi:10.5194/gmd-16-5219-2023), 2023-09-08
Supplement: Supplementary file 3 [file gmd-16-5219-2023-supplement.zip]

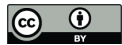

## *Supplement of*

# **Metrics for evaluating the quality in linear atmospheric inverse problems: a case study of a trace gas inversion**

Vineet Yadav et al.

*Correspondence to:* Subhomoy Ghosh (sghosh4@nd.edu)

- gmd-16-5219-2023-supplement-title-page.pdf
- Final\_Code
  - .DS\_Store
  - Section\_3\_1
    - \* Readme.txt
    - \* Running\_file\_section\_3\_1.m
    - \* Running\_file\_section\_3\_1.mlx
    - \* Running\_file\_section\_3\_1.pdf
    - \* data\_section\_3.1.mat
    - \* ioami\_jaccard.m
    - \* jsd.m
  - Section\_3\_2
    - \* Readme.txt
    - \* Running\_file\_section\_3\_2.m
    - \* Running\_file\_section\_3\_2.mlx
    - \* Running\_file\_section\_3\_2.pdf
    - \* data\_section\_3.2.mat
    - \* figure\_last\_scatter.m
    - \* return\_importance.m

The copyright of individual parts of the supplement might differ from the article licence.
